# Supplementary material
Source: publisher figshare collection journal article supplement (https://gsajournals.figshare.com/ndownloader/files/14394629)
Supplement: Supplementary file 1 [file 14394629]

## Sheet: Reads to RPM
Dataset S4. Conversion of Raw reads to RPM values from twelve small RNA libraries
	reads	rpm	reads	rpm	reads	rpm	reads	rpm	reads	rpm	reads	rpm	reads	rpm	reads	rpm	reads	rpm	reads	rpm	reads	rpm	reads	rpm
miRNA name	FB-Ab1		FB-Ab2		FB-Ab3		MG1		MG2		MG3		OV1		OV2		OV3		R1		R2		R3
bantam 5p	27052	15547.1	14606	7938.04	25390	11039.1	10847	2493.56	4301	1693.31	4257	1702.8	1646	3502.13	1261	3075.61	1055	2776.32	6921	5365.12	3069	3568.6	2834	1981.82
bantam 3p	92020	52885.1	121674	66127.2	135417	58877	99700	22919.5	54864	21600	48600	19440	8693	18495.7	8428	20556.1	6481	17055.3	24396	18911.6	11470	13337.2	13215	9241.26
let 7	6672	3834.48	8420	4576.09	10027	4359.57	12419	2854.94	6821	2685.43	5902	2360.8	1292	2748.94	1251	3051.22	957	2518.42	6117	4741.86	1959	2277.91	2178	1523.08
miR-1	97	55.7471	102	55.4348	103	44.7826	171	39.3103	78	30.7087	79	31.6	46	97.8723	42	102.439	34	89.4737	791	613.178	263	305.814	162	113.287
miR-10 5p	8628	4958.62	7950	4320.65	9810	4265.22	17256	3966.9	9959	3920.87	4996	1998.4	101	214.894	50	121.951	73	192.105	10811	8380.62	4619	5370.93	4295	3003.5
miR-10 3p	175	100.575	145	78.8043	186	80.8696	789	181.379	495	194.882	202	80.8	0	0	0	0	0	0	245	189.922	102	118.605	100	69.9301
miR-100 5p	3976	2285.06	3464	1882.61	4270	1856.52	4590	1055.17	2218	873.228	1991	796.4	575	1223.4	535	1304.88	432	1136.84	6703	5196.12	2767	3217.44	2714	1897.9
miR-100 3p	2335	1341.95	1610	875	3354	1458.26	2929	673.333	1204	474.016	1607	642.8	288	612.766	176	429.268	247	650	1879	1456.59	846	983.721	751	525.175
miR-124	8	4.5977	7	3.80435	8	3.47826	0	0	0	0	0	0	0	0	0	0	0	0	97	75.1938	45	52.3256	44	30.7692
miR-125	1338	768.966	1004	545.652	1282	557.391	1642	377.471	778	306.299	722	288.8	179	380.851	146	356.098	109	286.842	2279	1766.67	868	1009.3	799	558.741
miR-133	284	163.218	252	136.957	325	141.304	36	8.27586	18	7.08661	24	9.6	3	6.38298	6	14.6341	3	7.89474	4851	3760.47	1907	2217.44	1838	1285.31
miR-13b	801	460.345	853	463.587	1006	437.391	1781	409.425	872	343.307	715	286	202	429.787	237	578.049	189	497.368	424	328.682	204	237.209	193	134.965
miR-14	12047	6923.56	10776	5856.52	15296	6650.43	16062	3692.41	8998	3542.52	7664	3065.6	3210	6829.79	2194	5351.22	1233	3244.74	9737	7548.06	5162	6002.33	4006	2801.4
miR-184	30854	17732.2	25137	13661.4	42474	18467	79773	18338.6	40322	15874.8	47123	18849.2	24000	51063.8	19967	48700	17307	45544.7	31116	24120.9	11325	13168.6	10003	6995.1
miR-210	0	0	0	0	1	0.434783	0	0	0	0	0	0	0	0	2	4.87805	1	2.63158	2897	2245.74	1102	1281.4	1342	938.462
miR-219	0	0	1	0.543478	0	0	0	0	0	0	0	0	0	0	0	0	0	0	4	3.10078	0	0	0	0
miR-263a	18950	10890.8	13119	7129.89	16105	7002.17	13329	3064.14	6571	2587.01	3657	1462.8	15807	33631.9	11921	29075.6	9166	24121.1	48581	37659.7	16018	18625.6	13969	9768.53
miR-275 5p	1008	579.31	189	102.717	569	247.391	1798	413.333	108	42.5197	219	87.6	0	0	0	0	0	0	408	316.279	143	166.279	200	139.86
miR-275 3p	7103	4082.18	7343	3990.76	9516	4137.39	7306	1679.54	3033	1194.09	2013	805.2	670	1425.53	660	1609.76	545	1434.21	6160	4775.19	3129	3638.37	2397	1676.22
miR-276 5p	114	65.5172	92	50	123	53.4783	28	6.43678	14	5.51181	10	4	3	6.38298	4	9.7561	4	10.5263	117	90.6977	41	47.6744	46	32.1678
miR-276 3p	45058	25895.4	37241	20239.7	52119	22660.4	16041	3687.59	8653	3406.69	6678	2671.2	6154	13093.6	5783	14104.9	4713	12402.6	76264	59119.4	30250	35174.4	28394	19855.9
miR-277	4564	2622.99	3028	1645.65	4219	1834.35	17104	3931.95	8123	3198.03	5737	2294.8	337	717.021	328	800	320	842.105	53274	41297.7	30450	35407	21401	14965.7
miR-278 5p	52	29.8851	54	29.3478	65	28.2609	116	26.6667	54	21.2598	47	18.8	0	0	0	0	0	0	268	207.752	99	115.116	135	94.4056
miR-278 3p	187	107.471	197	107.065	234	101.739	663	152.414	318	125.197	297	118.8	9	19.1489	12	29.2683	13	34.2105	314	243.411	149	173.256	129	90.2098
miR-279	2497	1435.06	2094	1138.04	2948	1281.74	2164	497.471	1070	421.26	703	281.2	1084	2306.38	981	2392.68	850	2236.84	930	720.93	408	474.419	331	231.469
miR-281 5p	51887	29820.1	25363	13784.2	52203	22697	1679621	386120	967953	381084	731094	292438	40660	86510.6	32629	79582.9	25532	67189.5	21254	16476	14004	16283.7	8939	6251.05
miR-281 3p	1046	601.149	603	327.717	1205	523.913	44626	10258.9	24296	9565.35	17188	6875.2	779	1657.45	635	1548.78	609	1602.63	215	166.667	115	133.721	93	65.035
miR-282	6	3.44828	6	3.26087	9	3.91304	3	0.689655	0	0	0	0	0	0	0	0	0	0	3	2.32558	0	0	0	0
miR-283	346	198.851	261	141.848	429	186.522	10007	2300.46	3853	1516.93	3093	1237.2	413	878.723	237	578.049	290	763.158	202	156.589	109	126.744	98	68.5315
miR-2b	1911	1098.28	1447	786.413	2051	891.739	3280	754.023	1483	583.858	1517	606.8	551	1172.34	588	1434.15	428	1126.32	2523	1955.81	1029	1196.51	878	613.986
miR-2-1	1817	1044.25	1318	716.304	2041	887.391	3348	769.655	1521	598.819	1575	630	655	1393.62	693	1690.24	540	1421.05	2189	1696.9	891	1036.05	803	561.538
miR-305 5p	1953	1122.41	2020	1097.83	2323	1010	2534	582.529	1310	515.748	819	327.6	168	357.447	134	326.829	107	281.579	1790	1387.6	662	769.767	735	513.986
miR-305 3p	2653	1524.71	897	487.5	1859	808.261	5991	1377.24	388	152.756	1130	452	159	338.298	63	153.659	109	286.842	1725	1337.21	636	739.535	789	551.748
miR-307	112	64.3678	105	57.0652	140	60.8696	4	0.91954	2	0.787402	4	1.6	5	10.6383	2	4.87805	2	5.26316	65	50.3876	20	23.2558	41	28.6713
miR-308	1	0.574713	2	1.08696	2	0.869565	0	0	0	0	0	0	0	0	0	0	0	0	0	0	0	0	0	0
miR-315	151	86.7816	176	95.6522	214	93.0435	8	1.83908	5	1.9685	3	1.2	1	2.12766	1	2.43902	3	7.89474	1739	1348.06	740	860.465	814	569.231
miR-317	3634	2088.51	2503	1360.33	4603	2001.3	6821	1568.05	2457	967.323	2116	846.4	93	197.872	56	136.585	78	205.263	3671	2845.74	1504	1748.84	1290	902.098
miR-7 5p	15	8.62069	27	14.6739	25	10.8696	21	4.82759	16	6.29921	10	4	50	106.383	57	139.024	36	94.7368	138	106.977	51	59.3023	52	36.3636
miR-7 3p	34	19.5402	36	19.5652	50	21.7391	56	12.8736	28	11.0236	23	9.2	18	38.2979	8	19.5122	6	15.7895	15	11.6279	2	2.32558	5	3.4965
miR-79	12	6.89655	21	11.413	28	12.1739	18	4.13793	10	3.93701	15	6	7	14.8936	14	34.1463	11	28.9474	2	1.55039	2	2.32558	1	0.699301
miR-8 5p	34685	19933.9	28480	15478.3	47592	20692.2	5633	1294.94	2667	1050	2537	1014.8	1137	2419.15	1166	2843.9	720	1894.74	13861	10745	5392	6269.77	4861	3399.3
miR-8 3p	725802	417128	785872	427104	1064607	462873	86904	19977.9	49555	19509.8	42012	16804.8	24833	52836.2	21434	52278	20449	53813.2	98958	76711.6	49541	57605.8	42807	29935
miR-9a	9666	5555.17	8645	4698.37	10213	4440.43	8507	1955.63	4140	1629.92	2706	1082.4	1361	2895.74	1428	3482.93	1223	3218.42	4502	3489.92	1623	1887.21	1594	1114.69
miR-92a	12	6.89655	19	10.3261	15	6.52174	22	5.05747	19	7.48031	15	6	432	919.149	456	1112.2	408	1073.68	33	25.5814	12	13.9535	12	8.39161
miR-92b	209	120.115	220	119.565	170	73.913	393	90.3448	252	99.2126	199	79.6	9267	19717	7574	18473.2	5232	13768.4	749	580.62	309	359.302	288	201.399
miR-9b	2651	1523.56	2555	1388.59	3531	1535.22	4526	1040.46	2239	881.496	1725	690	4860	10340.4	3661	8929.27	4050	10657.9	474	367.442	186	216.279	155	108.392
miR-9c	14442	8300	13609	7396.2	17418	7573.04	14521	3338.16	8091	3185.43	5700	2280	18268	38868.1	18627	45431.7	16067	42281.6	3837	2974.42	1366	1588.37	1451	1014.69
miR-iab-4	110	63.2184	127	69.0217	151	65.6522	24	5.51724	14	5.51181	20	8	6	12.766	7	17.0732	6	15.7895	0	0	0	0	0	0
miR-1174 5p	0	0	0	0	0	0	4262	979.77	1392	548.031	2231	892.4	0	0	0	0	0	0	0	0	0	0	0	0
miR-1174 3p	672	386.207	512	278.261	1919	834.348	73567	16912	32634	12848	27211	10884.4	17	36.1702	15	36.5854	15	39.4737	425	329.457	322	374.419	205	143.357
miR-1175 5p	66	37.931	263	142.935	30	13.0435	8742	2009.66	1680	661.417	4002	1600.8	0	0	0	0	0	0	87	67.4419	49	56.9767	33	23.0769
miR-1175 3p	12	6.89655	114	61.9565	61	26.5217	5133	1180	2721	1071.26	3676	1470.4	2	4.25532	4	9.7561	0	0	38	29.4574	18	20.9302	12	8.39161
miR-34 5p	5593	3214.37	3644	1980.43	6895	2997.83	7193	1653.56	3573	1406.69	3608	1443.2	141	300	138	336.585	136	357.895	14749	11433.3	5491	6384.88	6894	4820.98
miR-34 3p	413	237.356	245	133.152	584	253.913	652	149.885	324	127.559	370	148	23	48.9362	11	26.8293	22	57.8947	1893	1467.44	993	1154.65	878	613.986
miR-12 5p	590	339.08	693	376.63	1010	439.13	8840	2032.18	4721	1858.66	4424	1769.6	872	1855.32	740	1804.88	884	2326.32	943	731.008	325	377.907	401	280.42
miR-12 3p	145	83.3333	77	41.8478	195	84.7826	1654	380.23	509	200.394	885	354	38	80.8511	29	70.7317	66	173.684	136	105.426	30	34.8837	93	65.035
miR-996	971	558.046	1040	565.217	1386	602.609	2557	587.816	1528	601.575	1427	570.8	564	1200	625	1524.39	494	1300	373	289.147	152	176.744	160	111.888
miR-989 5p	0	0	0	0	0	0	0	0	0	0	0	0	630	1340.43	391	953.659	615	1618.42	0	0	0	0	0	0
miR-989 3p	299	171.839	567	308.152	316	137.391	24	5.51724	8	3.14961	26	10.4	29214	62157.4	32358	78922	28722	75584.2	14	10.8527	4	4.65116	20	13.986
miR-306	18359	10551.1	14404	7828.26	21346	9280.87	44210	10163.2	22397	8817.72	19632	7852.8	21962	46727.7	18446	44990.2	15307	40281.6	13401	10388.4	6197	7205.81	5770	4034.97
miR-11	7771	4466.09	7207	3916.85	11184	4862.61	21619	4969.89	12018	4731.5	9733	3893.2	3550	7553.19	3569	8704.88	2938	7731.58	3303	2560.47	1570	1825.58	1692	1183.22
miR-981	9	5.17241	16	8.69565	19	8.26087	0	0	0	0	0	0	0	0	1	2.43902	0	0	404	313.178	160	186.047	162	113.287
miR-87	157	90.2299	221	120.109	236	102.609	75	17.2414	49	19.2913	26	10.4	44	93.617	51	124.39	31	81.5789	127	98.4496	48	55.814	44	30.7692
miR-1889	61	35.0575	61	33.1522	70	30.4348	74	17.0115	50	19.685	29	11.6	56	119.149	38	92.6829	35	92.1053	67	51.938	27	31.3953	19	13.2867
miR-375	14	8.04598	9	4.8913	23	10	32	7.35632	30	11.811	16	6.4	2	4.25532	2	4.87805	2	5.26316	553	428.682	226	262.791	232	162.238
miR-1890	177	101.724	182	98.913	297	129.13	106	24.3678	64	25.1969	59	23.6	20	42.5532	6	14.6341	7	18.4211	237	183.721	104	120.93	113	79.021
miR-1891 5p	167	95.977	146	79.3478	239	103.913	4	0.91954	1	0.393701	0	0	1	2.12766	0	0	0	0	397	307.752	126	146.512	121	84.6154
miR-1891 3p	1015	583.333	747	405.978	1066	463.478	11	2.52874	4	1.5748	0	0	0	0	0	0	0	0	3701	2868.99	1322	1537.21	1507	1053.85
miR-190	421	241.954	442	240.217	437	190	639	146.897	291	114.567	223	89.2	88	187.234	77	187.805	46	121.053	273	211.628	99	115.116	89	62.2378
miR-929	0	0	0	0	0	0	0	0	0	0	0	0	0	0	0	0	0	0	2	1.55039	1	1.16279	1	0.699301
miR-927 5p	231	132.759	161	87.5	268	116.522	93	21.3793	32	12.5984	41	16.4	18	38.2979	21	51.2195	8	21.0526	1316	1020.16	561	652.326	459	320.979
miR-927 3p	77	44.2529	100	54.3478	113	49.1304	34	7.81609	9	3.54331	15	6	12	25.5319	5	12.1951	8	21.0526	390	302.326	193	224.419	185	129.371
miR-993	63	36.2069	61	33.1522	103	44.7826	1	0.229885	0	0	1	0.4	0	0	0	0	0	0	235	182.171	111	129.07	75	52.4476
miR-988	118	67.8161	89	48.3696	179	77.8261	157	36.092	71	27.9528	60	24	24	51.0638	20	48.7805	14	36.8421	102	79.0698	32	37.2093	29	20.2797
miR-970	1443	829.31	1351	734.239	1836	798.261	2627	603.908	1340	527.559	1247	498.8	269	572.34	263	641.463	220	578.947	2601	2016.28	1192	1386.05	1026	717.483
miR-957	453	260.345	441	239.674	467	203.043	27	6.2069	8	3.14961	14	5.6	1	2.12766	5	12.1951	3	7.89474	8555	6631.78	3513	4084.88	3239	2265.03
miR-137	21	12.069	18	9.78261	28	12.1739	10	2.29885	6	2.3622	6	2.4	0	0	0	0	0	0	23	17.8295	9	10.4651	15	10.4895
miR-965-1	121	69.5402	102	55.4348	185	80.4348	359	82.5287	117	46.063	140	56	43	91.4894	20	48.7805	28	73.6842	132	102.326	54	62.7907	49	34.2657
miR-965-2	121	69.5402	102	55.4348	185	80.4348	359	82.5287	117	46.063	140	56	43	91.4894	20	48.7805	28	73.6842	132	102.326	54	62.7907	49	34.2657
miR-1000	39	22.4138	57	30.9783	83	36.087	18	4.13793	18	7.08661	13	5.2	1	2.12766	2	4.87805	0	0	387	300	126	146.512	157	109.79
miR-286	130	74.7126	58	31.5217	116	50.4348	75	17.2414	41	16.1417	25	10	41	87.234	187	456.098	29	76.3158	58	44.9612	27	31.3953	30	20.979
miR-263b	2	1.14943	0	0	1	0.434783	0	0	0	0	0	0	0	0	0	0	0	0	2	1.55039	2	2.32558	0	0
miR-309-1	8	4.5977	5	2.71739	3	1.30435	1	0.229885	1	0.393701	0	0	0	0	11	26.8293	0	0	5	3.87597	0	0	1	0.699301
miR-309-2	8	4.5977	5	2.71739	3	1.30435	1	0.229885	1	0.393701	0	0	0	0	11	26.8293	0	0	5	3.87597	0	0	1	0.699301
miR-2c	638	366.667	606	329.348	760	330.435	860	197.701	392	154.331	291	116.4	212	451.064	214	521.951	166	436.842	314	243.411	128	148.837	128	89.5105
miR-286b	67	38.5057	67	36.413	54	23.4783	22	5.05747	13	5.11811	5	2	10	21.2766	3	7.31707	11	28.9474	31	24.031	14	16.2791	15	10.4895
miR-2944a-2	19	10.9195	10	5.43478	15	6.52174	22	5.05747	8	3.14961	7	2.8	10	21.2766	24	58.5366	6	15.7895	11	8.52713	3	3.48837	2	1.3986
miR-10377a	13	7.47126	37	20.1087	59	25.6522	2	0.45977	0	0	0	0	1	2.12766	1	2.43902	2	5.26316	0	0	0	0	0	0
miR-10377b	11	6.32184	28	15.2174	35	15.2174	1	0.229885	0	0	2	0.8	0	0	0	0	0	0	0	0	0	0	0	0
miR-10366a-1	0	0	0	0	0	0	0	0	0	0	0	0	0	0	0	0	0	0	0	0	0	0	0	0
miR-10366a-2	0	0	0	0	0	0	0	0	0	0	0	0	0	0	0	0	0	0	0	0	0	0	0	0
miR-10366b	1	0.574713	1	0.543478	1	0.434783	1	0.229885	1	0.393701	0	0	0	0	0	0	0	0	0	0	0	0	0	0
miR-10367	0	0	0	0	0	0	0	0	0	0	0	0	0	0	1	2.43902	1	2.63158	0	0	0	0	0	0
miR-10368	0	0	1	0.543478	0	0	8	1.83908	5	1.9685	4	1.6	1	2.12766	1	2.43902	0	0	4	3.10078	1	1.16279	0	0
miR-10369	0	0	1	0.543478	3	1.30435	1	0.229885	1	0.393701	0	0	0	0	0	0	0	0	0	0	0	0	0	0
miR-10370-1	0	0	0	0	0	0	0	0	0	0	0	0	0	0	0	0	0	0	0	0	0	0	0	0
miR-10370-2	0	0	0	0	0	0	0	0	0	0	0	0	0	0	0	0	0	0	0	0	0	0	0	0
miR-10372a	0	0	0	0	0	0	0	0	0	0	0	0	0	0	0	0	0	0	0	0	0	0	0	0
miR-10372b	0	0	0	0	0	0	0	0	0	0	0	0	0	0	0	0	0	0	0	0	0	0	0	0
miR-10373	0	0	0	0	0	0	0	0	0	0	0	0	0	0	0	0	0	0	0	0	0	0	0	0
miR-10379	0	0	0	0	0	0	0	0	0	0	0	0	0	0	0	0	0	0	0	0	0	0	0	0
miR-10380	0	0	0	0	0	0	0	0	0	0	0	0	0	0	0	0	0	0	0	0	0	0	0	0
miR-10381	4	2.29885	6	3.26087	8	3.47826	45	10.3448	19	7.48031	13	5.2	0	0	0	0	2	5.26316	12	9.30233	2	2.32558	2	1.3986
miR-PN18	0	0	0	0	0	0	0	0	0	0	0	0	0	0	0	0	0	0	0	0	0	0	0	0
miR-31	166	95.4023	179	97.2826	228	99.1304	231	53.1034	121	47.6378	107	42.8	28	59.5745	38	92.6829	21	55.2632	221	171.318	95	110.465	104	72.7273
miR-33 5p	5	2.87356	12	6.52174	7	3.04348	5	1.14943	2	0.787402	0	0	1	2.12766	1	2.43902	1	2.63158	2	1.55039	0	0	0	0
miR-33 3p	187	107.471	74	40.2174	246	106.957	127	29.1954	49	19.2913	49	19.6	10	21.2766	10	24.3902	8	21.0526	116	89.9225	45	52.3256	74	51.7483
miR-71 5p	8	4.5977	12	6.52174	12	5.21739	3	0.689655	2	0.787402	2	0.8	17	36.1702	16	39.0244	15	39.4737	36	27.907	11	12.7907	10	6.99301
miR-71 3p	2154	1237.93	1465	796.196	2218	964.348	543	124.828	281	110.63	166	66.4	1190	2531.91	906	2209.76	874	2300	2769	2146.51	1378	1602.33	1091	762.937
miR-193	3	1.72414	1	0.543478	5	2.17391	0	0	0	0	0	0	0	0	0	0	0	0	5	3.87597	5	5.81395	1	0.699301
miR-252 5p	4716	2710.34	4491	2440.76	6586	2863.48	133	30.5747	90	35.4331	64	25.6	16	34.0426	36	87.8049	36	94.7368	4737	3672.09	1912	2223.26	1966	1374.83
miR-252 3p	111	63.7931	119	64.6739	202	87.8261	1	0.229885	1	0.393701	3	1.2	0	0	1	2.43902	0	0	104	80.6202	43	50	31	21.6783
miR-285	9	5.17241	5	2.71739	11	4.78261	0	0	0	0	0	0	3	6.38298	6	14.6341	1	2.63158	598	463.566	308	358.14	258	180.42
miR-316	877	504.023	1247	677.717	1497	650.87	1275	293.103	666	262.205	533	213.2	355	755.319	324	790.244	228	600	277	214.729	151	175.581	133	93.007
miR-932	3	1.72414	6	3.26087	4	1.73913	0	0	0	0	0	0	0	0	0	0	0	0	729	565.116	307	356.977	256	179.021
miR-980 5p	204	117.241	39	21.1957	274	119.13	20	4.5977	2	0.787402	4	1.6	3	6.38298	2	4.87805	6	15.7895	152	117.829	35	40.6977	63	44.0559
miR-980 3p	19	10.9195	17	9.23913	28	12.1739	2	0.45977	0	0	1	0.4	0	0	0	0	1	2.63158	4	3.10078	3	3.48837	4	2.7972
miR-998	40	22.9885	40	21.7391	57	24.7826	28	6.43678	30	11.811	17	6.8	52	110.638	67	163.415	39	102.632	23	17.8295	9	10.4651	12	8.39161
miR-999	2788	1602.3	3183	1729.89	3936	1711.3	6970	1602.3	3567	1404.33	3199	1279.6	960	2042.55	1033	2519.51	890	2342.11	3922	3040.31	1642	1909.3	2154	1506.29
miR-2765	8	4.5977	0	0	1	0.434783	0	0	0	0	0	0	17	36.1702	24	58.5366	20	52.6316	36	27.907	12	13.9535	9	6.29371
miR-2940	15393	8846.55	10384	5643.48	19646	8541.74	21038	4836.32	9850	3877.95	7158	2863.2	483	1027.66	606	1478.05	299	786.842	7303	5661.24	2992	3479.07	2350	1643.36
miR-2944a	19	10.9195	9	4.8913	15	6.52174	21	4.82759	8	3.14961	7	2.8	10	21.2766	24	58.5366	6	15.7895	11	8.52713	3	3.48837	2	1.3986
miR-2944b	7	4.02299	4	2.17391	8	3.47826	3	0.689655	1	0.393701	0	0	3	6.38298	19	46.3415	2	5.26316	3	2.32558	2	2.32558	2	1.3986
miR-2945	575	330.46	460	250	501	217.826	327	75.1724	142	55.9055	126	50.4	102	217.021	59	143.902	59	155.263	676	524.031	332	386.047	250	174.825
miR-N1-3p	6	3.44828	6	3.26087	12	5.21739	16	3.67816	5	1.9685	5	2	1	2.12766	0	0	2	5.26316	11	8.52713	3	3.48837	0	0
miR-10365	59	33.908	81	44.0217	71	30.8696	105	24.1379	63	24.8031	30	12	47	100	40	97.561	33	86.8421	96	74.4186	33	38.3721	25	17.4825
miR-N3-3p	1	0.574713	1	0.543478	1	0.434783	1	0.229885	0	0	0	0	63	134.043	45	109.756	29	76.3158	0	0	0	0	0	0
miR-12414	11	6.32184	10	5.43478	7	3.04348	7	1.6092	7	2.75591	0	0	3	6.38298	10	24.3902	1	2.63158	58	44.9612	39	45.3488	19	13.2867
miR-12416	0	0	0	0	0	0	0	0	0	0	0	0	0	0	0	0	0	0	0	0	0	0	0	0
miR-12417	0	0	2	1.08696	3	1.30435	1	0.229885	2	0.787402	0	0	1	2.12766	0	0	0	0	0	0	0	0	0	0
miR-12418	1	0.574713	1	0.543478	4	1.73913	4	0.91954	2	0.787402	2	0.8	0	0	0	0	1	2.63158	1	0.775194	0	0	1	0.699301
miR-10378	1	0.574713	4	2.17391	6	2.6087	56	12.8736	13	5.11811	31	12.4	0	0	0	0	0	0	32	24.8062	8	9.30233	11	7.69231
miR-N12-3p	0	0	1	0.543478	0	0	5	1.14943	0	0	0	0	0	0	0	0	0	0	5	3.87597	0	0	1	0.699301
miR-10376	62	35.6322	46	25	54	23.4783	56	12.8736	26	10.2362	28	11.2	6	12.766	6	14.6341	2	5.26316	50	38.7597	32	37.2093	19	13.2867
miR-PN5-5p	0	0	0	0	0	0	0	0	0	0	0	0	15	31.9149	15	36.5854	9	23.6842	0	0	0	0	0	0
miR-PN6-3p	0	0	1	0.543478	0	0	5	1.14943	2	0.787402	1	0.4	0	0	0	0	0	0	0	0	0	0	0	0
miR-PN8-3p	82	47.1264	200	108.696	351	152.609	4	0.91954	9	3.54331	3	1.2	2	4.25532	5	12.1951	2	5.26316	3	2.32558	7	8.13953	2	1.3986
miR-PN12-3p	11	6.32184	3	1.63043	3	1.30435	10	2.29885	5	1.9685	1	0.4	3	6.38298	3	7.31707	5	13.1579	0	0	0	0	0	0
miR-PN13-5p	0	0	0	0	0	0	0	0	0	0	0	0	0	0	0	0	0	0	0	0	0	0	0	0
miR-PN16-5p	24	13.7931	11	5.97826	25	10.8696	0	0	1	0.393701	0	0	0	0	1	2.43902	0	0	3	2.32558	4	4.65116	1	0.699301
miR-PN17-3p	9	5.17241	0	0	7	3.04348	2	0.45977	0	0	0	0	0	0	0	0	0	0	3	2.32558	1	1.16279	1	0.699301
miR-PN19-5p	10	5.74713	8	4.34783	8	3.47826	10	2.29885	3	1.1811	4	1.6	2	4.25532	2	4.87805	0	0	8	6.20155	2	2.32558	2	1.3986
miR-10355	8	4.5977	4	2.17391	6	2.6087	9	2.06897	11	4.33071	8	3.2	9	19.1489	8	19.5122	8	21.0526	4	3.10078	3	3.48837	1	0.699301
miR-PN26-5p	0	0	1	0.543478	0	0	1	0.229885	1	0.393701	0	0	0	0	0	0	0	0	2	1.55039	2	2.32558	1	0.699301
miR-PN27-3p	0	0	0	0	0	0	0	0	0	0	0	0	0	0	0	0	0	0	0	0	0	0	0	0
miR-PN29-3p	42	24.1379	31	16.8478	33	14.3478	49	11.2644	25	9.84252	13	5.2	398	846.809	363	885.366	222	584.211	52	40.3101	24	27.907	11	7.69231
miR-PN30-5p	0	0	0	0	0	0	0	0	0	0	0	0	0	0	0	0	0	0	0	0	0	0	0	0
miR-PN32-5p	0	0	0	0	0	0	0	0	0	0	0	0	0	0	0	0	0	0	0	0	0	0	0	0
miR-PN33-5p	1	0.574713	0	0	2	0.869565	0	0	0	0	0	0	98	208.511	55	134.146	75	197.368	0	0	0	0	0	0
miR-PN34-3p	12	6.89655	4	2.17391	6	2.6087	2	0.45977	4	1.5748	1	0.4	1	2.12766	0	0	1	2.63158	15	11.6279	5	5.81395	6	4.1958
miR-PN35-3p	6	3.44828	5	2.71739	4	1.73913	1	0.229885	2	0.787402	1	0.4	1	2.12766	0	0	0	0	6	4.65116	1	1.16279	2	1.3986
miR-2796	82	47.1264	67	36.413	119	51.7391	207	47.5862	80	31.4961	87	34.8	29	61.7021	32	78.0488	23	60.5263	1383	1072.09	597	694.186	459	320.979
miR-3R_8221	31	17.8161	41	22.2826	86	37.3913	1	0.229885	3	1.1811	1	0.4	0	0	2	4.87805	1	2.63158	1	0.775194	1	1.16279	2	1.3986
miR-X_39763	0	0	0	0	0	0	0	0	0	0	0	0	15	31.9149	9	21.9512	16	42.1053	0	0	0	0	0	0
miR-2942	0	0	0	0	0	0	9	2.06897	4	1.5748	3	1.2	0	0	1	2.43902	0	0	0	0	0	0	1	0.699301
miR-2L_14200	2	1.14943	0	0	1	0.434783	3	0.689655	2	0.787402	2	0.8	0	0	0	0	0	0	0	0	1	1.16279	2	1.3986
miR-2L_14684	0	0	1	0.543478	2	0.869565	2	0.45977	1	0.393701	0	0	1	2.12766	1	2.43902	0	0	2	1.55039	1	1.16279	0	0
miR-3L_35860	0	0	0	0	0	0	4	0.91954	2	0.787402	2	0.8	0	0	0	0	0	0	0	0	1	1.16279	0	0
miR-3R_8209	1	0.574713	3	1.63043	4	1.73913	2	0.45977	1	0.393701	0	0	0	0	0	0	0	0	0	0	0	0	0	0
miR-X_41652	3	1.72414	2	1.08696	3	1.30435	2	0.45977	1	0.393701	1	0.4	0	0	0	0	0	0	1	0.775194	7	8.13953	2	1.3986
total read number of small RNA 20-24nt	1741604		1838414		2304788		4354913		2541077		2495339		473050		414093		378503		1290962		859297		1431511
scaling factor	1.74		1.84		2.3034		4.35		2.54		2.5		0.47		0.41		0.38		1.29		0.86		1.43

## Sheet: RPM avg-med
Dataset S4. Conversion of Raw reads to RPM values from twelve small RNA libraries
miRNA name	FB-Ab1	FB-Ab2	FB-Ab3	avg	med	MG1	MG2	MG3	avg	med	OV1	OV2	OV3	avg	med	R1	R2	R3	avg	med
bantam 5p	15547.1	7938.04	11039.1	11508.1	11039.1	2493.56	1693.31	1702.8	1963.22	1702.8	3502.13	3075.61	2776.32	3118.02	3075.61	5365.12	3568.6	1981.82	3638.51	3568.6
bantam 3p	52885.1	66127.2	58877	59296.4	58877	22919.5	21600	19440	21319.8	21600	18495.7	20556.1	17055.3	18702.4	18495.7	18911.6	13337.2	9241.26	13830	13337.2
let 7	3834.48	4576.09	4359.57	4256.71	4359.57	2854.94	2685.43	2360.8	2633.73	2685.43	2748.94	3051.22	2518.42	2772.86	2748.94	4741.86	2277.91	1523.08	2847.61	2277.91
miR-1	55.7471	55.4348	44.7826	51.9882	55.4348	39.3103	30.7087	31.6	33.873	31.6	97.8723	102.439	89.4737	96.595	97.8723	613.178	305.814	113.287	344.093	305.814
miR-10 5p	4958.62	4320.65	4265.22	4514.83	4320.65	3966.9	3920.87	1998.4	3295.39	3920.87	214.894	121.951	192.105	176.317	192.105	8380.62	5370.93	3003.5	5585.02	5370.93
miR-10 3p	100.575	78.8043	80.8696	86.7495	80.8696	181.379	194.882	80.8	152.354	181.379	0	0	0	0	0	189.922	118.605	69.9301	126.152	118.605
miR-100 5p	2285.06	1882.61	1856.52	2008.06	1882.61	1055.17	873.228	796.4	908.267	873.228	1223.4	1304.88	1136.84	1221.71	1223.4	5196.12	3217.44	1897.9	3437.16	3217.44
miR-100 3p	1341.95	875	1458.26	1225.07	1341.95	673.333	474.016	642.8	596.716	642.8	612.766	429.268	650	564.011	612.766	1456.59	983.721	525.175	988.495	983.721
miR-124	4.5977	3.80435	3.47826	3.9601	3.80435	0	0	0	0	0	0	0	0	0	0	75.1938	52.3256	30.7692	52.7629	52.3256
miR-125	768.966	545.652	557.391	624.003	557.391	377.471	306.299	288.8	324.19	306.299	380.851	356.098	286.842	341.264	356.098	1766.67	1009.3	558.741	1111.57	1009.3
miR-133	163.218	136.957	141.304	147.16	141.304	8.27586	7.08661	9.6	8.32083	8.27586	6.38298	14.6341	7.89474	9.63729	7.89474	3760.47	2217.44	1285.31	2421.07	2217.44
miR-13b	460.345	463.587	437.391	453.774	460.345	409.425	343.307	286	346.244	343.307	429.787	578.049	497.368	501.735	497.368	328.682	237.209	134.965	233.619	237.209
miR-14	6923.56	5856.52	6650.43	6476.84	6650.43	3692.41	3542.52	3065.6	3433.51	3542.52	6829.79	5351.22	3244.74	5141.91	5351.22	7548.06	6002.33	2801.4	5450.6	6002.33
miR-184	17732.2	13661.4	18467	16620.2	17732.2	18338.6	15874.8	18849.2	17687.5	18338.6	51063.8	48700	45544.7	48436.2	48700	24120.9	13168.6	6995.1	14761.5	13168.6
miR-210	0	0	0.434783	0.144928	0	0	0	0	0	0	0	4.87805	2.63158	2.50321	2.63158	2245.74	1281.4	938.462	1488.53	1281.4
miR-219	0	0.543478	0	0.181159	0	0	0	0	0	0	0	0	0	0	0	3.10078	0	0	1.03359	0
miR-263a	10890.8	7129.89	7002.17	8340.96	7129.89	3064.14	2587.01	1462.8	2371.32	2587.01	33631.9	29075.6	24121.1	28942.9	29075.6	37659.7	18625.6	9768.53	22017.9	18625.6
miR-275 5p	579.31	102.717	247.391	309.806	247.391	413.333	42.5197	87.6	181.151	87.6	0	0	0	0	0	316.279	166.279	139.86	207.473	166.279
miR-275 3p	4082.18	3990.76	4137.39	4070.11	4082.18	1679.54	1194.09	805.2	1226.28	1194.09	1425.53	1609.76	1434.21	1489.83	1434.21	4775.19	3638.37	1676.22	3363.26	3638.37
miR-276 5p	65.5172	50	53.4783	56.3318	53.4783	6.43678	5.51181	4	5.3162	5.51181	6.38298	9.7561	10.5263	8.88846	9.7561	90.6977	47.6744	32.1678	56.8466	47.6744
miR-276 3p	25895.4	20239.7	22660.4	22931.8	22660.4	3687.59	3406.69	2671.2	3255.16	3406.69	13093.6	14104.9	12402.6	13200.4	13093.6	59119.4	35174.4	19855.9	38049.9	35174.4
miR-277	2622.99	1645.65	1834.35	2034.33	1834.35	3931.95	3198.03	2294.8	3141.6	3198.03	717.021	800	842.105	786.376	800	41297.7	35407	14965.7	30556.8	35407
miR-278 5p	29.8851	29.3478	28.2609	29.1646	29.3478	26.6667	21.2598	18.8	22.2422	21.2598	0	0	0	0	0	207.752	115.116	94.4056	139.091	115.116
miR-278 3p	107.471	107.065	101.739	105.425	107.065	152.414	125.197	118.8	132.137	125.197	19.1489	29.2683	34.2105	27.5426	29.2683	243.411	173.256	90.2098	168.959	173.256
miR-279	1435.06	1138.04	1281.74	1284.95	1281.74	497.471	421.26	281.2	399.977	421.26	2306.38	2392.68	2236.84	2311.97	2306.38	720.93	474.419	231.469	475.606	474.419
miR-281 5p	29820.1	13784.2	22697	22100.4	22697	386120	381084	292438	353214	381084	86510.6	79582.9	67189.5	77761	79582.9	16476	16283.7	6251.05	13003.6	16283.7
miR-281 3p	601.149	327.717	523.913	484.26	523.913	10258.9	9565.35	6875.2	8899.8	9565.35	1657.45	1548.78	1602.63	1602.95	1602.63	166.667	133.721	65.035	121.808	133.721
miR-282	3.44828	3.26087	3.91304	3.54073	3.44828	0.689655	0	0	0.229885	0	0	0	0	0	0	2.32558	0	0	0.775194	0
miR-283	198.851	141.848	186.522	175.74	186.522	2300.46	1516.93	1237.2	1684.86	1516.93	878.723	578.049	763.158	739.977	763.158	156.589	126.744	68.5315	117.288	126.744
miR-2b	1098.28	786.413	891.739	925.476	891.739	754.023	583.858	606.8	648.227	606.8	1172.34	1434.15	1126.32	1244.27	1172.34	1955.81	1196.51	613.986	1255.44	1196.51
miR-2-1	1044.25	716.304	887.391	882.65	887.391	769.655	598.819	630	666.158	630	1393.62	1690.24	1421.05	1501.64	1421.05	1696.9	1036.05	561.538	1098.16	1036.05
miR-305 5p	1122.41	1097.83	1010	1076.75	1097.83	582.529	515.748	327.6	475.292	515.748	357.447	326.829	281.579	321.952	326.829	1387.6	769.767	513.986	890.45	769.767
miR-305 3p	1524.71	487.5	808.261	940.158	808.261	1377.24	152.756	452	660.666	452	338.298	153.659	286.842	259.6	286.842	1337.21	739.535	551.748	876.164	739.535
miR-307	64.3678	57.0652	60.8696	60.7675	60.8696	0.91954	0.787402	1.6	1.10231	0.91954	10.6383	4.87805	5.26316	6.9265	5.26316	50.3876	23.2558	28.6713	34.1049	28.6713
miR-308	0.574713	1.08696	0.869565	0.843745	0.869565	0	0	0	0	0	0	0	0	0	0	0	0	0	0	0
miR-315	86.7816	95.6522	93.0435	91.8258	93.0435	1.83908	1.9685	1.2	1.66919	1.83908	2.12766	2.43902	7.89474	4.15381	2.43902	1348.06	860.465	569.231	925.919	860.465
miR-317	2088.51	1360.33	2001.3	1816.71	2001.3	1568.05	967.323	846.4	1127.26	967.323	197.872	136.585	205.263	179.907	197.872	2845.74	1748.84	902.098	1832.22	1748.84
miR-7 5p	8.62069	14.6739	10.8696	11.3881	10.8696	4.82759	6.29921	4	5.04227	4.82759	106.383	139.024	94.7368	113.381	106.383	106.977	59.3023	36.3636	67.5476	59.3023
miR-7 3p	19.5402	19.5652	21.7391	20.2815	19.5652	12.8736	11.0236	9.2	11.0324	11.0236	38.2979	19.5122	15.7895	24.5332	19.5122	11.6279	2.32558	3.4965	5.81666	3.4965
miR-79	6.89655	11.413	12.1739	10.1612	11.413	4.13793	3.93701	6	4.69165	4.13793	14.8936	34.1463	28.9474	25.9958	28.9474	1.55039	2.32558	0.699301	1.52509	1.55039
miR-8 5p	19933.9	15478.3	20692.2	18701.4	19933.9	1294.94	1050	1014.8	1119.91	1050	2419.15	2843.9	1894.74	2385.93	2419.15	10745	6269.77	3399.3	6804.68	6269.77
miR-8 3p	417128	427104	462873	435702	427104	19977.9	19509.8	16804.8	18764.2	19509.8	52836.2	52278	53813.2	52975.8	52836.2	76711.6	57605.8	29935	54750.8	57605.8
miR-9a	5555.17	4698.37	4440.43	4897.99	4698.37	1955.63	1629.92	1082.4	1555.98	1629.92	2895.74	3482.93	3218.42	3199.03	3218.42	3489.92	1887.21	1114.69	2163.94	1887.21
miR-92a	6.89655	10.3261	6.52174	7.91479	6.89655	5.05747	7.48031	6	6.17926	6	919.149	1112.2	1073.68	1035.01	1073.68	25.5814	13.9535	8.39161	15.9755	13.9535
miR-92b	120.115	119.565	73.913	104.531	119.565	90.3448	99.2126	79.6	89.7191	90.3448	19717	18473.2	13768.4	17319.5	18473.2	580.62	359.302	201.399	380.44	359.302
miR-9b	1523.56	1388.59	1535.22	1482.46	1523.56	1040.46	881.496	690	870.652	881.496	10340.4	8929.27	10657.9	9975.86	10340.4	367.442	216.279	108.392	230.704	216.279
miR-9c	8300	7396.2	7573.04	7756.41	7573.04	3338.16	3185.43	2280	2934.53	3185.43	38868.1	45431.7	42281.6	42193.8	42281.6	2974.42	1588.37	1014.69	1859.16	1588.37
miR-iab-4	63.2184	69.0217	65.6522	65.9641	65.6522	5.51724	5.51181	8	6.34302	5.51724	12.766	17.0732	15.7895	15.2095	15.7895	0	0	0	0	0
miR-1174 5p	0	0	0	0	0	979.77	548.031	892.4	806.734	892.4	0	0	0	0	0	0	0	0	0	0
miR-1174 3p	386.207	278.261	834.348	499.605	386.207	16912	12848	10884.4	13548.1	12848	36.1702	36.5854	39.4737	37.4098	36.5854	329.457	374.419	143.357	282.411	329.457
miR-1175 5p	37.931	142.935	13.0435	64.6364	37.931	2009.66	661.417	1600.8	1423.96	1600.8	0	0	0	0	0	67.4419	56.9767	23.0769	49.1652	56.9767
miR-1175 3p	6.89655	61.9565	26.5217	31.7916	26.5217	1180	1071.26	1470.4	1240.55	1180	4.25532	9.7561	0	4.67047	4.25532	29.4574	20.9302	8.39161	19.5931	20.9302
miR-34 5p	3214.37	1980.43	2997.83	2730.88	2997.83	1653.56	1406.69	1443.2	1501.15	1443.2	300	336.585	357.895	331.493	336.585	11433.3	6384.88	4820.98	7546.4	6384.88
miR-34 3p	237.356	133.152	253.913	208.141	237.356	149.885	127.559	148	141.815	148	48.9362	26.8293	57.8947	44.5534	48.9362	1467.44	1154.65	613.986	1078.69	1154.65
miR-12 5p	339.08	376.63	439.13	384.947	376.63	2032.18	1858.66	1769.6	1886.82	1858.66	1855.32	1804.88	2326.32	1995.5	1855.32	731.008	377.907	280.42	463.111	377.907
miR-12 3p	83.3333	41.8478	84.7826	69.9879	83.3333	380.23	200.394	354	311.541	354	80.8511	70.7317	173.684	108.422	80.8511	105.426	34.8837	65.035	68.4483	65.035
miR-996	558.046	565.217	602.609	575.291	565.217	587.816	601.575	570.8	586.73	587.816	1200	1524.39	1300	1341.46	1300	289.147	176.744	111.888	192.593	176.744
miR-989 5p	0	0	0	0	0	0	0	0	0	0	1340.43	953.659	1618.42	1304.17	1340.43	0	0	0	0	0
miR-989 3p	171.839	308.152	137.391	205.794	171.839	5.51724	3.14961	10.4	6.35562	5.51724	62157.4	78922	75584.2	72221.2	75584.2	10.8527	4.65116	13.986	9.82996	10.8527
miR-306	10551.1	7828.26	9280.87	9220.09	9280.87	10163.2	8817.72	7852.8	8944.58	8817.72	46727.7	44990.2	40281.6	43999.8	44990.2	10388.4	7205.81	4034.97	7209.72	7205.81
miR-11	4466.09	3916.85	4862.61	4415.18	4466.09	4969.89	4731.5	3893.2	4531.53	4731.5	7553.19	8704.88	7731.58	7996.55	7731.58	2560.47	1825.58	1183.22	1856.42	1825.58
miR-981	5.17241	8.69565	8.26087	7.37631	8.26087	0	0	0	0	0	0	2.43902	0	0.813008	0	313.178	186.047	113.287	204.171	186.047
miR-87	90.2299	120.109	102.609	104.316	102.609	17.2414	19.2913	10.4	15.6442	17.2414	93.617	124.39	81.5789	99.8621	93.617	98.4496	55.814	30.7692	61.6776	55.814
miR-1889	35.0575	33.1522	30.4348	32.8815	33.1522	17.0115	19.685	11.6	16.0988	17.0115	119.149	92.6829	92.1053	101.312	92.6829	51.938	31.3953	13.2867	32.2067	31.3953
miR-375	8.04598	4.8913	10	7.64576	8.04598	7.35632	11.811	6.4	8.52245	7.35632	4.25532	4.87805	5.26316	4.79884	4.87805	428.682	262.791	162.238	284.57	262.791
miR-1890	101.724	98.913	129.13	109.923	101.724	24.3678	25.1969	23.6	24.3882	24.3678	42.5532	14.6341	18.4211	25.2028	18.4211	183.721	120.93	79.021	127.891	120.93
miR-1891 5p	95.977	79.3478	103.913	93.0793	95.977	0.91954	0.393701	0	0.437747	0.393701	2.12766	0	0	0.70922	0	307.752	146.512	84.6154	179.626	146.512
miR-1891 3p	583.333	405.978	463.478	484.263	463.478	2.52874	1.5748	0	1.36785	1.5748	0	0	0	0	0	2868.99	1537.21	1053.85	1820.02	1537.21
miR-190	241.954	240.217	190	224.057	240.217	146.897	114.567	89.2	116.888	114.567	187.234	187.805	121.053	165.364	187.234	211.628	115.116	62.2378	129.661	115.116
miR-929	0	0	0	0	0	0	0	0	0	0	0	0	0	0	0	1.55039	1.16279	0.699301	1.13749	1.16279
miR-927 5p	132.759	87.5	116.522	112.26	116.522	21.3793	12.5984	16.4	16.7926	16.4	38.2979	51.2195	21.0526	36.8567	38.2979	1020.16	652.326	320.979	664.487	652.326
miR-927 3p	44.2529	54.3478	49.1304	49.2437	49.1304	7.81609	3.54331	6	5.78647	6	25.5319	12.1951	21.0526	19.5932	21.0526	302.326	224.419	129.371	218.705	224.419
miR-993	36.2069	33.1522	44.7826	38.0472	36.2069	0.229885	0	0.4	0.209962	0.229885	0	0	0	0	0	182.171	129.07	52.4476	121.229	129.07
miR-988	67.8161	48.3696	77.8261	64.6706	67.8161	36.092	27.9528	24	29.3482	27.9528	51.0638	48.7805	36.8421	45.5621	48.7805	79.0698	37.2093	20.2797	45.5196	37.2093
miR-970	829.31	734.239	798.261	787.27	798.261	603.908	527.559	498.8	543.422	527.559	572.34	641.463	578.947	597.584	578.947	2016.28	1386.05	717.483	1373.27	1386.05
miR-957	260.345	239.674	203.043	234.354	239.674	6.2069	3.14961	5.6	4.9855	5.6	2.12766	12.1951	7.89474	7.40584	7.89474	6631.78	4084.88	2265.03	4327.23	4084.88
miR-137	12.069	9.78261	12.1739	11.3418	12.069	2.29885	2.3622	2.4	2.35369	2.3622	0	0	0	0	0	17.8295	10.4651	10.4895	12.928	10.4895
miR-965-1	69.5402	55.4348	80.4348	68.4699	69.5402	82.5287	46.063	56	61.5306	56	91.4894	48.7805	73.6842	71.318	73.6842	102.326	62.7907	34.2657	66.4607	62.7907
miR-965-2	69.5402	55.4348	80.4348	68.4699	69.5402	82.5287	46.063	56	61.5306	56	91.4894	48.7805	73.6842	71.318	73.6842	102.326	62.7907	34.2657	66.4607	62.7907
miR-1000	22.4138	30.9783	36.087	29.8263	30.9783	4.13793	7.08661	5.2	5.47485	5.2	2.12766	4.87805	0	2.33524	2.12766	300	146.512	109.79	185.434	146.512
miR-286	74.7126	31.5217	50.4348	52.2231	50.4348	17.2414	16.1417	10	14.461	16.1417	87.234	456.098	76.3158	206.549	87.234	44.9612	31.3953	20.979	32.4452	31.3953
miR-263b	1.14943	0	0.434783	0.528069	0.434783	0	0	0	0	0	0	0	0	0	0	1.55039	2.32558	0	1.29199	1.55039
miR-309-1	4.5977	2.71739	1.30435	2.87315	2.71739	0.229885	0.393701	0	0.207862	0.229885	0	26.8293	0	8.94309	0	3.87597	0	0.699301	1.52509	0.699301
miR-309-2	4.5977	2.71739	1.30435	2.87315	2.71739	0.229885	0.393701	0	0.207862	0.229885	0	26.8293	0	8.94309	0	3.87597	0	0.699301	1.52509	0.699301
miR-2c	366.667	329.348	330.435	342.15	330.435	197.701	154.331	116.4	156.144	154.331	451.064	521.951	436.842	469.952	451.064	243.411	148.837	89.5105	160.586	148.837
miR-286b	38.5057	36.413	23.4783	32.799	36.413	5.05747	5.11811	2	4.05853	5.05747	21.2766	7.31707	28.9474	19.1803	21.2766	24.031	16.2791	10.4895	16.9332	16.2791
miR-2944a-2	10.9195	5.43478	6.52174	7.62535	6.52174	5.05747	3.14961	2.8	3.66903	3.14961	21.2766	58.5366	15.7895	31.8676	21.2766	8.52713	3.48837	1.3986	4.47137	3.48837
miR-10377a	7.47126	20.1087	25.6522	17.744	20.1087	0.45977	0	0	0.153257	0	2.12766	2.43902	5.26316	3.27661	2.43902	0	0	0	0	0
miR-10377b	6.32184	15.2174	15.2174	12.2522	15.2174	0.229885	0	0.8	0.343295	0.229885	0	0	0	0	0	0	0	0	0	0
miR-10366a-1	0	0	0	0	0	0	0	0	0	0	0	0	0	0	0	0	0	0	0	0
miR-10366a-2	0	0	0	0	0	0	0	0	0	0	0	0	0	0	0	0	0	0	0	0
miR-10366b	0.574713	0.543478	0.434783	0.517658	0.543478	0.229885	0.393701	0	0.207862	0.229885	0	0	0	0	0	0	0	0	0	0
miR-10367	0	0	0	0	0	0	0	0	0	0	0	2.43902	2.63158	1.6902	2.43902	0	0	0	0	0
miR-10368	0	0.543478	0	0.181159	0	1.83908	1.9685	1.6	1.80253	1.83908	2.12766	2.43902	0	1.52223	2.12766	3.10078	1.16279	0	1.42119	1.16279
miR-10369	0	0.543478	1.30435	0.615942	0.543478	0.229885	0.393701	0	0.207862	0.229885	0	0	0	0	0	0	0	0	0	0
miR-10370-1	0	0	0	0	0	0	0	0	0	0	0	0	0	0	0	0	0	0	0	0
miR-10370-2	0	0	0	0	0	0	0	0	0	0	0	0	0	0	0	0	0	0	0	0
miR-10372a	0	0	0	0	0	0	0	0	0	0	0	0	0	0	0	0	0	0	0	0
miR-10372b	0	0	0	0	0	0	0	0	0	0	0	0	0	0	0	0	0	0	0	0
miR-10373	0	0	0	0	0	0	0	0	0	0	0	0	0	0	0	0	0	0	0	0
miR-10379	0	0	0	0	0	0	0	0	0	0	0	0	0	0	0	0	0	0	0	0
miR-10380	0	0	0	0	0	0	0	0	0	0	0	0	0	0	0	0	0	0	0	0
miR-10381	2.29885	3.26087	3.47826	3.01266	3.26087	10.3448	7.48031	5.2	7.67505	7.48031	0	0	5.26316	1.75439	0	9.30233	2.32558	1.3986	4.34217	2.32558
miR-PN18	0	0	0	0	0	0	0	0	0	0	0	0	0	0	0	0	0	0	0	0
miR-31	95.4023	97.2826	99.1304	97.2718	97.2826	53.1034	47.6378	42.8	47.8471	47.6378	59.5745	92.6829	55.2632	69.1735	59.5745	171.318	110.465	72.7273	118.17	110.465
miR-33 5p	2.87356	6.52174	3.04348	4.14626	3.04348	1.14943	0.787402	0	0.645609	0.787402	2.12766	2.43902	2.63158	2.39942	2.43902	1.55039	0	0	0.516796	0
miR-33 3p	107.471	40.2174	106.957	84.8817	106.957	29.1954	19.2913	19.6	22.6956	19.6	21.2766	24.3902	21.0526	22.2398	21.2766	89.9225	52.3256	51.7483	64.6654	52.3256
miR-71 5p	4.5977	6.52174	5.21739	5.44561	5.21739	0.689655	0.787402	0.8	0.759019	0.787402	36.1702	39.0244	39.4737	38.2228	39.0244	27.907	12.7907	6.99301	15.8969	12.7907
miR-71 3p	1237.93	796.196	964.348	999.492	964.348	124.828	110.63	66.4	100.619	110.63	2531.91	2209.76	2300	2347.22	2300	2146.51	1602.33	762.937	1503.92	1602.33
miR-193	1.72414	0.543478	2.17391	1.48051	1.72414	0	0	0	0	0	0	0	0	0	0	3.87597	5.81395	0.699301	3.46307	3.87597
miR-252 5p	2710.34	2440.76	2863.48	2671.53	2710.34	30.5747	35.4331	25.6	30.5359	30.5747	34.0426	87.8049	94.7368	72.1948	87.8049	3672.09	2223.26	1374.83	2423.39	2223.26
miR-252 3p	63.7931	64.6739	87.8261	72.0977	64.6739	0.229885	0.393701	1.2	0.607862	0.393701	0	2.43902	0	0.813008	0	80.6202	50	21.6783	50.7662	50
miR-285	5.17241	2.71739	4.78261	4.22414	4.78261	0	0	0	0	0	6.38298	14.6341	2.63158	7.8829	6.38298	463.566	358.14	180.42	334.042	358.14
miR-316	504.023	677.717	650.87	610.87	650.87	293.103	262.205	213.2	256.169	262.205	755.319	790.244	600	715.188	755.319	214.729	175.581	93.007	161.106	175.581
miR-932	1.72414	3.26087	1.73913	2.24138	1.73913	0	0	0	0	0	0	0	0	0	0	565.116	356.977	179.021	367.038	356.977
miR-980 5p	117.241	21.1957	119.13	85.8558	117.241	4.5977	0.787402	1.6	2.32837	1.6	6.38298	4.87805	15.7895	9.01683	6.38298	117.829	40.6977	44.0559	67.5277	44.0559
miR-980 3p	10.9195	9.23913	12.1739	10.7775	10.9195	0.45977	0	0.4	0.28659	0.4	0	0	2.63158	0.877193	0	3.10078	3.48837	2.7972	3.12878	3.10078
miR-998	22.9885	21.7391	24.7826	23.1701	22.9885	6.43678	11.811	6.8	8.34927	6.8	110.638	163.415	102.632	125.562	110.638	17.8295	10.4651	8.39161	12.2287	10.4651
miR-999	1602.3	1729.89	1711.3	1681.16	1711.3	1602.3	1404.33	1279.6	1428.74	1404.33	2042.55	2519.51	2342.11	2301.39	2342.11	3040.31	1909.3	1506.29	2151.97	1909.3
miR-2765	4.5977	0	0.434783	1.67749	0.434783	0	0	0	0	0	36.1702	58.5366	52.6316	49.1128	52.6316	27.907	13.9535	6.29371	16.0514	13.9535
miR-2940	8846.55	5643.48	8541.74	7677.26	8541.74	4836.32	3877.95	2863.2	3859.16	3877.95	1027.66	1478.05	786.842	1097.52	1027.66	5661.24	3479.07	1643.36	3594.56	3479.07
miR-2944a	10.9195	4.8913	6.52174	7.44419	6.52174	4.82759	3.14961	2.8	3.5924	3.14961	21.2766	58.5366	15.7895	31.8676	21.2766	8.52713	3.48837	1.3986	4.47137	3.48837
miR-2944b	4.02299	2.17391	3.47826	3.22505	3.47826	0.689655	0.393701	0	0.361119	0.393701	6.38298	46.3415	5.26316	19.3292	6.38298	2.32558	2.32558	1.3986	2.01659	2.32558
miR-2945	330.46	250	217.826	266.095	250	75.1724	55.9055	50.4	60.4926	55.9055	217.021	143.902	155.263	172.062	155.263	524.031	386.047	174.825	361.634	386.047
miR-N1-3p	3.44828	3.26087	5.21739	3.97551	3.44828	3.67816	1.9685	2	2.54889	2	2.12766	0	5.26316	2.46361	2.12766	8.52713	3.48837	0	4.00517	3.48837
miR-10365	33.908	44.0217	30.8696	36.2665	33.908	24.1379	24.8031	12	20.3137	24.1379	100	97.561	86.8421	94.801	97.561	74.4186	38.3721	17.4825	43.4244	38.3721
miR-N3-3p	0.574713	0.543478	0.434783	0.517658	0.543478	0.229885	0	0	0.0766284	0	134.043	109.756	76.3158	106.705	109.756	0	0	0	0	0
miR-12414	6.32184	5.43478	3.04348	4.93337	5.43478	1.6092	2.75591	0	1.45503	1.6092	6.38298	24.3902	2.63158	11.1349	6.38298	44.9612	45.3488	13.2867	34.5323	44.9612
miR-12416	0	0	0	0	0	0	0	0	0	0	0	0	0	0	0	0	0	0	0	0
miR-12417	0	1.08696	1.30435	0.797101	1.08696	0.229885	0.787402	0	0.339096	0.229885	2.12766	0	0	0.70922	0	0	0	0	0	0
miR-12418	0.574713	0.543478	1.73913	0.95244	0.574713	0.91954	0.787402	0.8	0.835647	0.8	0	0	2.63158	0.877193	0	0.775194	0	0.699301	0.491498	0.699301
miR-10378	0.574713	2.17391	2.6087	1.78577	2.17391	12.8736	5.11811	12.4	10.1306	12.4	0	0	0	0	0	24.8062	9.30233	7.69231	13.9336	9.30233
miR-N12-3p	0	0.543478	0	0.181159	0	1.14943	0	0	0.383142	0	0	0	0	0	0	3.87597	0	0.699301	1.52509	0.699301
miR-10376	35.6322	25	23.4783	28.0368	25	12.8736	10.2362	11.2	11.4366	11.2	12.766	14.6341	5.26316	10.8878	12.766	38.7597	37.2093	13.2867	29.7519	37.2093
miR-PN5-5p	0	0	0	0	0	0	0	0	0	0	31.9149	36.5854	23.6842	30.7282	31.9149	0	0	0	0	0
miR-PN6-3p	0	0.543478	0	0.181159	0	1.14943	0.787402	0.4	0.778942	0.787402	0	0	0	0	0	0	0	0	0	0
miR-PN8-3p	47.1264	108.696	152.609	102.81	108.696	0.91954	3.54331	1.2	1.88762	1.2	4.25532	12.1951	5.26316	7.23787	5.26316	2.32558	8.13953	1.3986	3.95457	2.32558
miR-PN12-3p	6.32184	1.63043	1.30435	3.08554	1.63043	2.29885	1.9685	0.4	1.55578	1.9685	6.38298	7.31707	13.1579	8.95265	7.31707	0	0	0	0	0
miR-PN13-5p	0	0	0	0	0	0	0	0	0	0	0	0	0	0	0	0	0	0	0	0
miR-PN16-5p	13.7931	5.97826	10.8696	10.2136	10.8696	0	0.393701	0	0.131234	0	0	2.43902	0	0.813008	0	2.32558	4.65116	0.699301	2.55868	2.32558
miR-PN17-3p	5.17241	0	3.04348	2.73863	3.04348	0.45977	0	0	0.153257	0	0	0	0	0	0	2.32558	1.16279	0.699301	1.39589	1.16279
miR-PN19-5p	5.74713	4.34783	3.47826	4.5244	4.34783	2.29885	1.1811	1.6	1.69332	1.6	4.25532	4.87805	0	3.04446	4.25532	6.20155	2.32558	1.3986	3.30858	2.32558
miR-10355	4.5977	2.17391	2.6087	3.12677	2.6087	2.06897	4.33071	3.2	3.19989	3.2	19.1489	19.5122	21.0526	19.9046	19.5122	3.10078	3.48837	0.699301	2.42948	3.10078
miR-PN26-5p	0	0.543478	0	0.181159	0	0.229885	0.393701	0	0.207862	0.229885	0	0	0	0	0	1.55039	2.32558	0.699301	1.52509	1.55039
miR-PN27-3p	0	0	0	0	0	0	0	0	0	0	0	0	0	0	0	0	0	0	0	0
miR-PN29-3p	24.1379	16.8478	14.3478	18.4445	16.8478	11.2644	9.84252	5.2	8.76896	9.84252	846.809	885.366	584.211	772.128	846.809	40.3101	27.907	7.69231	25.3031	27.907
miR-PN30-5p	0	0	0	0	0	0	0	0	0	0	0	0	0	0	0	0	0	0	0	0
miR-PN32-5p	0	0	0	0	0	0	0	0	0	0	0	0	0	0	0	0	0	0	0	0
miR-PN33-5p	0.574713	0	0.869565	0.481426	0.574713	0	0	0	0	0	208.511	134.146	197.368	180.008	197.368	0	0	0	0	0
miR-PN34-3p	6.89655	2.17391	2.6087	3.89305	2.6087	0.45977	1.5748	0.4	0.811524	0.45977	2.12766	0	2.63158	1.58641	2.12766	11.6279	5.81395	4.1958	7.21255	5.81395
miR-PN35-3p	3.44828	2.71739	1.73913	2.63493	2.71739	0.229885	0.787402	0.4	0.472429	0.4	2.12766	0	0	0.70922	0	4.65116	1.16279	1.3986	2.40418	1.3986
miR-2796	47.1264	36.413	51.7391	45.0929	47.1264	47.5862	31.4961	34.8	37.9608	34.8	61.7021	78.0488	60.5263	66.7591	61.7021	1072.09	694.186	320.979	695.753	694.186
miR-3R_8221	17.8161	22.2826	37.3913	25.83	22.2826	0.229885	1.1811	0.4	0.603662	0.4	0	4.87805	2.63158	2.50321	2.63158	0.775194	1.16279	1.3986	1.1122	1.16279
miR-X_39763	0	0	0	0	0	0	0	0	0	0	31.9149	21.9512	42.1053	31.9905	31.9149	0	0	0	0	0
miR-2942	0	0	0	0	0	2.06897	1.5748	1.2	1.61459	1.5748	0	2.43902	0	0.813008	0	0	0	0.699301	0.2331	0
miR-2L_14200	1.14943	0	0.434783	0.528069	0.434783	0.689655	0.787402	0.8	0.759019	0.787402	0	0	0	0	0	0	1.16279	1.3986	0.853797	1.16279
miR-2L_14684	0	0.543478	0.869565	0.471014	0.543478	0.45977	0.393701	0	0.28449	0.393701	2.12766	2.43902	0	1.52223	2.12766	1.55039	1.16279	0	0.904393	1.16279
miR-3L_35860	0	0	0	0	0	0.91954	0.787402	0.8	0.835647	0.8	0	0	0	0	0	0	1.16279	0	0.387597	0
miR-3R_8209	0.574713	1.63043	1.73913	1.31476	1.63043	0.45977	0.393701	0	0.28449	0.393701	0	0	0	0	0	0	0	0	0	0
miR-X_41652	1.72414	1.08696	1.30435	1.37181	1.30435	0.45977	0.393701	0.4	0.417824	0.4	0	0	0	0	0	0.775194	8.13953	1.3986	3.43778	1.3986

## Sheet: RPM log10 values
Dataset S4. Conversion of Raw reads to RPM values from twelve small RNA libraries
	Average RPM					Log10
miRNA name	FB-Ab	MG	OV	R	miRNA name	FB-Ab	MG	OV	R
bantam 5p	11508.1	1963.22	3118.02	3638.51	bantam 5p	4.061	3.29297	3.49388	3.56092
bantam 3p	59296.4	21319.8	18702.4	13830	bantam 3p	4.77303	4.32878	4.2719	4.14082
let 7	4256.71	2633.73	2772.86	2847.61	let 7	3.62907	3.42057	3.44293	3.45448
miR-1	51.9882	33.873	96.595	344.093	miR-1	1.7159	1.52985	1.98495	2.53668
miR-10 5p	4514.83	3295.39	176.317	5585.02	miR-10 5p	3.65464	3.51791	2.24629	3.74702
miR-10 3p	86.7495	152.354	0	126.152	miR-10 3p	1.93827	2.18285	0	2.1009
miR-100 5p	2008.06	908.267	1221.71	3437.16	miR-100 5p	3.30278	2.95821	3.08697	3.5362
miR-100 3p	1225.07	596.716	564.011	988.495	miR-100 3p	3.08816	2.77577	2.75129	2.99497
miR-124	3.9601	0	0	52.7629	miR-124	0.597707	0	0	1.72233
miR-125	624.003	324.19	341.264	1111.57	miR-125	2.79519	2.5108	2.53309	3.04594
miR-133	147.16	8.32083	9.63729	2421.07	miR-133	2.16779	0.920166	0.983955	3.38401
miR-13b	453.774	346.244	501.735	233.619	miR-13b	2.65684	2.53938	2.70047	2.36851
miR-14	6476.84	3433.51	5141.91	5450.6	miR-14	3.81136	3.53574	3.71112	3.73644
miR-184	16620.2	17687.5	48436.2	14761.5	miR-184	4.22064	4.24767	4.68517	4.16913
miR-210	0.144928	0	2.50321	1488.53	miR-210	0	0	0.398497	3.17276
miR-219	0.181159	0	0	1.03359	miR-219	0	0	0	0.014349
miR-263a	8340.96	2371.32	28942.9	22017.9	miR-263a	3.92122	3.37499	4.46154	4.34278
miR-275 5p	309.806	181.151	0	207.473	miR-275 5p	2.49109	2.25804	0	2.31696
miR-275 3p	4070.11	1226.28	1489.83	3363.26	miR-275 3p	3.60961	3.08859	3.17314	3.52676
miR-276 5p	56.3318	5.3162	8.88846	56.8466	miR-276 5p	1.75075	0.725601	0.948827	1.7547
miR-276 3p	22931.8	3255.16	13200.4	38049.9	miR-276 3p	4.36044	3.51257	4.12059	4.58035
miR-277	2034.33	3141.6	786.376	30556.8	miR-277	3.30842	3.49715	2.89563	4.48511
miR-278 5p	29.1646	22.2422	0	139.091	miR-278 5p	1.46486	1.34718	0	2.1433
miR-278 3p	105.425	132.137	27.5426	168.959	miR-278 3p	2.02294	2.12102	1.44	2.22778
miR-279	1284.95	399.977	2311.97	475.606	miR-279	3.10889	2.60204	3.36398	2.67725
miR-281 5p	22100.4	353214	77761	13003.6	miR-281 5p	4.3444	5.54804	4.89076	4.11406
miR-281 3p	484.26	8899.8	1602.95	121.808	miR-281 3p	2.68508	3.94938	3.20492	2.08567
miR-282	3.54073	0.229885	0	0.775194	miR-282	0.549093	0	0	0
miR-283	175.74	1684.86	739.977	117.288	miR-283	2.24487	3.22656	2.86922	2.06925
miR-2b	925.476	648.227	1244.27	1255.44	miR-2b	2.96637	2.81173	3.09491	3.09879
miR-2-1	882.65	666.158	1501.64	1098.16	miR-2-2	2.94579	2.82358	3.17657	3.04067
miR-305 5p	1076.75	475.292	321.952	890.45	miR-305 5p	3.03211	2.67696	2.50779	2.94961
miR-305 3p	940.158	660.666	259.6	876.164	miR-305 3p	2.9732	2.81998	2.4143	2.94259
miR-307	60.7675	1.10231	6.9265	34.1049	miR-307	1.78367	0.0423053	0.840514	1.53282
miR-308	0.843745	0	0	0	miR-308	0	0	0	0
miR-315	91.8258	1.66919	4.15381	925.919	miR-315	1.96296	0.222507	0.618446	2.96657
miR-317	1816.71	1127.26	179.907	1832.22	miR-317	3.25929	3.05202	2.25505	3.26298
miR-7 5p	11.3881	5.04227	113.381	67.5476	miR-7 5p	1.05645	0.702626	2.05454	1.82961
miR-7 3p	20.2815	11.0324	24.5332	5.81666	miR-7 3p	1.3071	1.04267	1.38975	0.764674
miR-79	10.1612	4.69165	25.9958	1.52509	miR-79	1.00694	0.671325	1.4149	0.183295
miR-8 5p	18701.4	1119.91	2385.93	6804.68	miR-8 5p	4.27188	3.04918	3.37766	3.83281
miR-8 3p	435702	18764.2	52975.8	54750.8	miR-8 3p	5.63919	4.27333	4.72408	4.73839
miR-9a	4897.99	1555.98	3199.03	2163.94	miR-9a	3.69002	3.19201	3.50502	3.33525
miR-92a	7.91479	6.17926	1035.01	15.9755	miR-92a	0.89844	0.790937	3.01494	1.20345
miR-92b	104.531	89.7191	17319.5	380.44	miR-92b	2.01925	1.95289	4.23854	2.58029
miR-9b	1482.46	870.652	9975.86	230.704	miR-9b	3.17098	2.93984	3.99895	2.36306
miR-9c	7756.41	2934.53	42193.8	1859.16	miR-9c	3.88966	3.46754	4.62525	3.26932
miR-iab-4	65.9641	6.34302	15.2095	0	miR-iab-4	1.81931	0.802296	1.18212	0
miR-1174 5p	0	806.734	0	0	miR-1174 5p	0	2.90673	0	0
miR-1174 3p	499.605	13548.1	37.4098	282.411	miR-1174 3p	2.69863	4.13188	1.57298	2.45088
miR-1175 5p	64.6364	1423.96	0	49.1652	miR-1175 5p	1.81048	3.1535	0	1.69166
miR-1175 3p	31.7916	1240.55	4.67047	19.5931	miR-1175 3p	1.50231	3.09362	0.669361	1.2921
miR-34 5p	2730.88	1501.15	331.493	7546.4	miR-34 5p	3.4363	3.17642	2.52047	3.87774
miR-34 3p	208.141	141.815	44.5534	1078.69	miR-34 3p	2.31836	2.15172	1.64888	3.0329
miR-12 5p	384.947	1886.82	1995.5	463.111	miR-12 5p	2.5854	3.27573	3.30005	2.66569
miR-12 3p	69.9879	311.541	108.422	68.4483	miR-12 3p	1.84502	2.49352	2.03512	1.83536
miR-996	575.291	586.73	1341.46	192.593	miR-996	2.75989	2.76844	3.12758	2.28464
miR-989 5p	0	0	1304.17	0	miR-989 5p	0	0	3.11533	0
miR-989 3p	205.794	6.35562	72221.2	9.82996	miR-989 3p	2.31343	0.803158	4.85866	0.992552
miR-306	9220.09	8944.58	43999.8	7209.72	miR-306	3.96474	3.95156	4.64345	3.85792
miR-11	4415.18	4531.53	7996.55	1856.42	miR-11	3.64495	3.65624	3.9029	3.26868
miR-981	7.37631	0	0.813008	204.171	miR-981	0.867839	0	0	2.30999
miR-87	104.316	15.6442	99.8621	61.6776	miR-87	2.01835	1.19435	1.9994	1.79013
miR-1889	32.8815	16.0988	101.312	32.2067	miR-1889	1.51695	1.20679	2.00566	1.50795
miR-375	7.64576	8.52245	4.79884	284.57	miR-375	0.883421	0.930564	0.681136	2.45419
miR-1890	109.923	24.3882	25.2028	127.891	miR-1890	2.04109	1.38718	1.40145	2.10684
miR-1891 5p	93.0793	0.437747	0.70922	179.626	miR-1891 5p	1.96885	0	0	2.25437
miR-1891 3p	484.263	1.36785	0	1820.02	miR-1891 3p	2.68508	0.136037	0	3.26008
miR-190	224.057	116.888	165.364	129.661	miR-190	2.35036	2.06777	2.21844	2.11281
miR-929	0	0	0	1.13749	miR-929	0	0	0	0.0559487
miR-927 5p	112.26	16.7926	36.8567	664.487	miR-927 5p	2.05023	1.22512	1.56652	2.82249
miR-927 3p	49.2437	5.78647	19.5932	218.705	miR-927 3p	1.69235	0.762413	1.29211	2.33986
miR-993	38.0472	0.209962	0	121.229	miR-993	1.58032	0	0	2.08361
miR-988	64.6706	29.3482	45.5621	45.5196	miR-988	1.81071	1.46758	1.6586	1.6582
miR-970	787.27	543.422	597.584	1373.27	miR-970	2.89612	2.73514	2.7764	3.13776
miR-957	234.354	4.9855	7.40584	4327.23	miR-957	2.36987	0.697709	0.869574	3.63621
miR-137	11.3418	2.35369	0	12.928	miR-137	1.05468	0.371748	0	1.11153
miR-965-1	68.4699	61.5306	71.318	66.4607	miR-965-1	1.8355	1.78909	1.8532	1.82256
miR-965-2	68.4699	61.5306	71.318	66.4607	miR-965-2	1.8355	1.78909	1.8532	1.82256
miR-1000	29.8263	5.47485	2.33524	185.434	miR-1000	1.4746	0.738372	0.368331	2.26819
miR-286	52.2231	14.461	206.549	32.4452	miR-286	1.71786	1.1602	2.31502	1.51115
miR-263b	0.528069	0	0	1.29199	miR-263b	0	0	0	0.111259
miR-309-1	2.87315	0.207862	8.94309	1.52509	miR-309-1	0.458358	0	0.951488	0.183295
miR-309-2	2.87315	0.207862	8.94309	1.52509	miR-309-2	0.458358	0	0.951488	0.183295
miR-2c	342.15	156.144	469.952	160.586	miR-2c	2.53422	2.19353	2.67205	2.20571
miR-286b	32.799	4.05853	19.1803	16.9332	miR-286b	1.51586	0.608368	1.28286	1.22874
miR-2944a-2	7.62535	3.66903	31.8676	4.47137	miR-2944a-2	0.88226	0.564551	1.50335	0.65044
miR-10377a	17.744	0.153257	3.27661	0	miR-10377a	1.24905	0	0.515425	0
miR-10377b	12.2522	0.343295	0	0	miR-10377b	1.08821	0	0	0
miR-10366a-1	0	0	0	0	miR-10366a-1	0	0	0	0
miR-10366a-2	0	0	0	0	miR-10366a-2	0	0	0	0
miR-10366b	0.517658	0.207862	0	0	miR-10366b	0	0	0	0
miR-10367	0	0	1.6902	0	miR-10367	0	0	0.227938	0
miR-10368	0.181159	1.80253	1.52223	1.42119	miR-10368	0	0.255882	0.18248	0.152652
miR-10369	0.615942	0.207862	0	0	miR-10369	0	0	0	0
miR-10370-1	0	0	0	0	miR-10370-1	0	0	0	0
miR-10370-2	0	0	0	0	miR-10370-2	0	0	0	0
miR-10372a	0	0	0	0	miR-10372a	0	0	0	0
miR-10372b	0	0	0	0	miR-10372b	0	0	0	0
miR-10373	0	0	0	0	miR-10373	0	0	0	0
miR-10379	0	0	0	0	miR-10379	0	0	0	0
miR-10380	0	0	0	0	miR-10380	0	0	0	0
miR-10381	3.01266	7.67505	1.75439	4.34217	miR-10381	0.47895	0.885081	0.244125	0.637707
miR-PN18	0	0	0	0	miR-PN18	0	0	0	0
miR-31	97.2718	47.8471	69.1735	118.17	miR-31	1.98799	1.67986	1.83994	2.07251
miR-33 5p	4.14626	0.645609	2.39942	0.516796	miR-33 5p	0.617657	0	0.380106	0
miR-33 3p	84.8817	22.6956	22.2398	64.6654	miR-33 3p	1.92881	1.35594	1.34713	1.81067
miR-71 5p	5.44561	0.759019	38.2228	15.8969	miR-71 5p	0.736047	0	1.58232	1.20131
miR-71 3p	999.492	100.619	2347.22	1503.92	miR-71 3p	2.99978	2.00268	3.37055	3.17723
miR-193	1.48051	0	0	3.46307	miR-193	0.170411	0	0	0.539462
miR-252 5p	2671.53	30.5359	72.1948	2423.39	miR-252 5p	3.42676	1.48481	1.85851	3.38442
miR-252 3p	72.0977	0.607862	0.813008	50.7662	miR-252 3p	1.85792	0	0	1.70557
miR-285	4.22414	0	7.8829	334.042	miR-285	0.625738	0	0.896686	2.5238
miR-316	610.87	256.169	715.188	161.106	miR-316	2.78595	2.40853	2.85442	2.20711
miR-932	2.24138	0	0	367.038	miR-932	0.350515	0	0	2.56471
miR-980 5p	85.8558	2.32837	9.01683	67.5277	miR-980 5p	1.93377	0.367052	0.955054	1.82948
miR-980 3p	10.7775	0.28659	0.877193	3.12878	miR-980 3p	1.03252	0	0	0.495375
miR-998	23.1701	8.34927	125.562	12.2287	miR-998	1.36493	0.921648	2.09886	1.08738
miR-999	1681.16	1428.74	2301.39	2151.97	miR-999	3.22561	3.15495	3.36199	3.33284
miR-2765	1.67749	0	49.1128	16.0514	miR-2765	0.224661	0	1.69119	1.20551
miR-2940	7677.26	3859.16	1097.52	3594.56	miR-2940	3.88521	3.58649	3.04041	3.55565
miR-2944a	7.44419	3.5924	31.8676	4.47137	miR-2944a	0.871818	0.555384	1.50335	0.65044
miR-2944b	3.22505	0.361119	19.3292	2.01659	miR-2944b	0.508537	0	1.28621	0.304617
miR-2945	266.095	60.4926	172.062	361.634	miR-2945	2.42504	1.7817	2.23569	2.55827
miR-N1-3p	3.97551	2.54889	2.46361	4.00517	miR-N1-3p	0.599393	0.406351	0.391571	0.602621
miR-10365	36.2665	20.3137	94.801	43.4244	miR-10365	1.55951	1.30779	1.97681	1.63773
miR-N3-3p	0.517658	0.0766284	106.705	0	miR-N3-3p	0	0	2.02818	0
miR-12414	4.93337	1.45503	11.1349	34.5323	miR-12414	0.693143	0.162873	1.04669	1.53823
miR-12416	0	0	0	0	miR-12416	0	0	0	0
miR-12417	0.797101	0.339096	0.70922	0	miR-12417	0	0	0	0
miR-12418	0.95244	0.835647	0.877193	0.491498	miR-12418	0	0	0	0
miR-10378	1.78577	10.1306	0	13.9336	miR-10378	0.251826	1.00563	0	1.14406
miR-N12-3p	0.181159	0.383142	0	1.52509	miR-N12-3p	0	0	0	0.183295
miR-10376	28.0368	11.4366	10.8878	29.7519	miR-10376	1.44773	1.0583	1.03694	1.47351
miR-PN5-5p	0	0	30.7282	0	miR-PN5-5p	0	0	1.48754	0
miR-PN6-3p	0.181159	0.778942	0	0	miR-PN6-3p	0	0	0	0
miR-PN8-3p	102.81	1.88762	7.23787	3.95457	miR-PN8-3p	2.01204	0.275914	0.859611	0.5971
miR-PN12-3p	3.08554	1.55578	8.95265	0	miR-PN12-3p	0.489331	0.19195	0.951952	0
miR-PN13-5p	0	0	0	0	miR-PN13-5p	0	0	0	0
miR-PN16-5p	10.2136	0.131234	0.813008	2.55868	miR-PN16-5p	1.00918	0	0	0.408016
miR-PN17-3p	2.73863	0.153257	0	1.39589	miR-PN17-3p	0.437533	0	0	0.144851
miR-PN19-5p	4.5244	1.69332	3.04446	3.30858	miR-PN19-5p	0.655561	0.228738	0.48351	0.519641
miR-10355	3.12677	3.19989	19.9046	2.42948	miR-10355	0.495096	0.505135	1.29895	0.385514
miR-PN26-5p	0.181159	0.207862	0	1.52509	miR-PN26-5p	0	0	0	0.183295
miR-PN27-3p	0	0	0	0	miR-PN27-3p	0	0	0	0
miR-PN29-3p	18.4445	8.76896	772.128	25.3031	miR-PN29-3p	1.26587	0.942948	2.88769	1.40317
miR-PN30-5p	0	0	0	0	miR-PN30-5p	0	0	0	0
miR-PN32-5p	0	0	0	0	miR-PN32-5p	0	0	0	0
miR-PN33-5p	0.481426	0	180.008	0	miR-PN33-5p	0	0	2.25529	0
miR-PN34-3p	3.89305	0.811524	1.58641	7.21255	miR-PN34-3p	0.59029	0	0.200416	0.858089
miR-PN35-3p	2.63493	0.472429	0.70922	2.40418	miR-PN35-3p	0.420769	0	0	0.380968
miR-2796	45.0929	37.9608	66.7591	695.753	miR-2796	1.65411	1.57933	0	2.84245
miR-3R_8221	25.83	0.603662	2.50321	1.1122	miR-3R_8221	1.41212	0	0.398497	0.0461811
miR-X_39763	0	0	31.9905	0	miR-X_39763	0	0	1.50502	0
miR-2942	0	1.61459	0.813008	0.2331	miR-2942	0	0.208062	0	0
miR-2L_14200	0.528069	0.759019	0	0.853797	miR-2L_14200	0	0	0	0
miR-2L_14684	0.471014	0.28449	1.52223	0.904393	miR-2L_14684	0	0	0.18248	0
miR-3L_35860	0	0.835647	0	0.387597	miR-3L_35860	0	0	0	0
miR-3R_8209	1.31476	0.28449	0	0	miR-3R_8209	0.118846	0	0	0
miR-X_41652	1.37181	0.417824	0	3.43778	miR-X_41652	0.137295	0	0	0.536278
